# Supplementary material for: Cytological evidence of BSD2 functioning in both chloroplast division and dimorphic chloroplast formation in maize leaves
Source: PubMed Central journal article supplement (PMC6953307; doi:10.1186/s12870-019-2219-7), 2020-01-09
Supplement: 12870_2019_2219_MOESM1_ESM.pdf [file 12870_2019_2219_MOESM1_ESM.pdf]

**Table S1.** The sequences of the gene specific primers.

| Gene          | Forward (5'-3')       | Reverse (5'-3')       |
|---------------|-----------------------|-----------------------|
| <i>ACTIN</i>  | CTCATGCTATTCTCCGTTTGG | TCAGGCATCTCGTAGCTCTTC |
| <i>PDV1-1</i> | GCAAAGCCGTCTAGTCCTTG  | CCTCTGATCGGCTATGGGTA  |
| <i>PDV1-2</i> | TCGGGTGCTTGCTCTTTAT   | CAAGGACTAGACGGCTTTGC  |
| <i>PDV2</i>   | TGGGGAACGGTTCTTTGTAG  | CAGCACCAAACGCAGAATTA  |
| <i>FtsZ</i>   | CGAGTCCATTCAGGAAGCTC  | CTTGAAGTCCCCGTCTTCTC  |
| <i>ARC3</i>   | GGAGGGTGCCTTTGTTTATA  | CGTGGAAACTCAAGCACTCA  |
| <i>PDR1</i>   | CAGTTGCAGTCAAGCTCTCG  | AGCGTCGAACTCAGTCCTGT  |
| <i>ADL1A</i>  | TGCAGCTTTTGAGTCATTGG  | TTGGGATGGAGTTCCTCAAG  |
| <i>VIPP1</i>  | ATAGAGCGAGGCACCAAGAA  | TTTGACTGCCGTACTTGCAC  |
